# Supplementary figures and images for: The Autotrophic Core: An Ancient Network of 404 Reactions Converts H2, CO2, and NH3 into Amino Acids, Bases, and Cofactors
Source: MDPI journal article supplement (doi:10.3390/microorganisms9020458), 2021-02-23

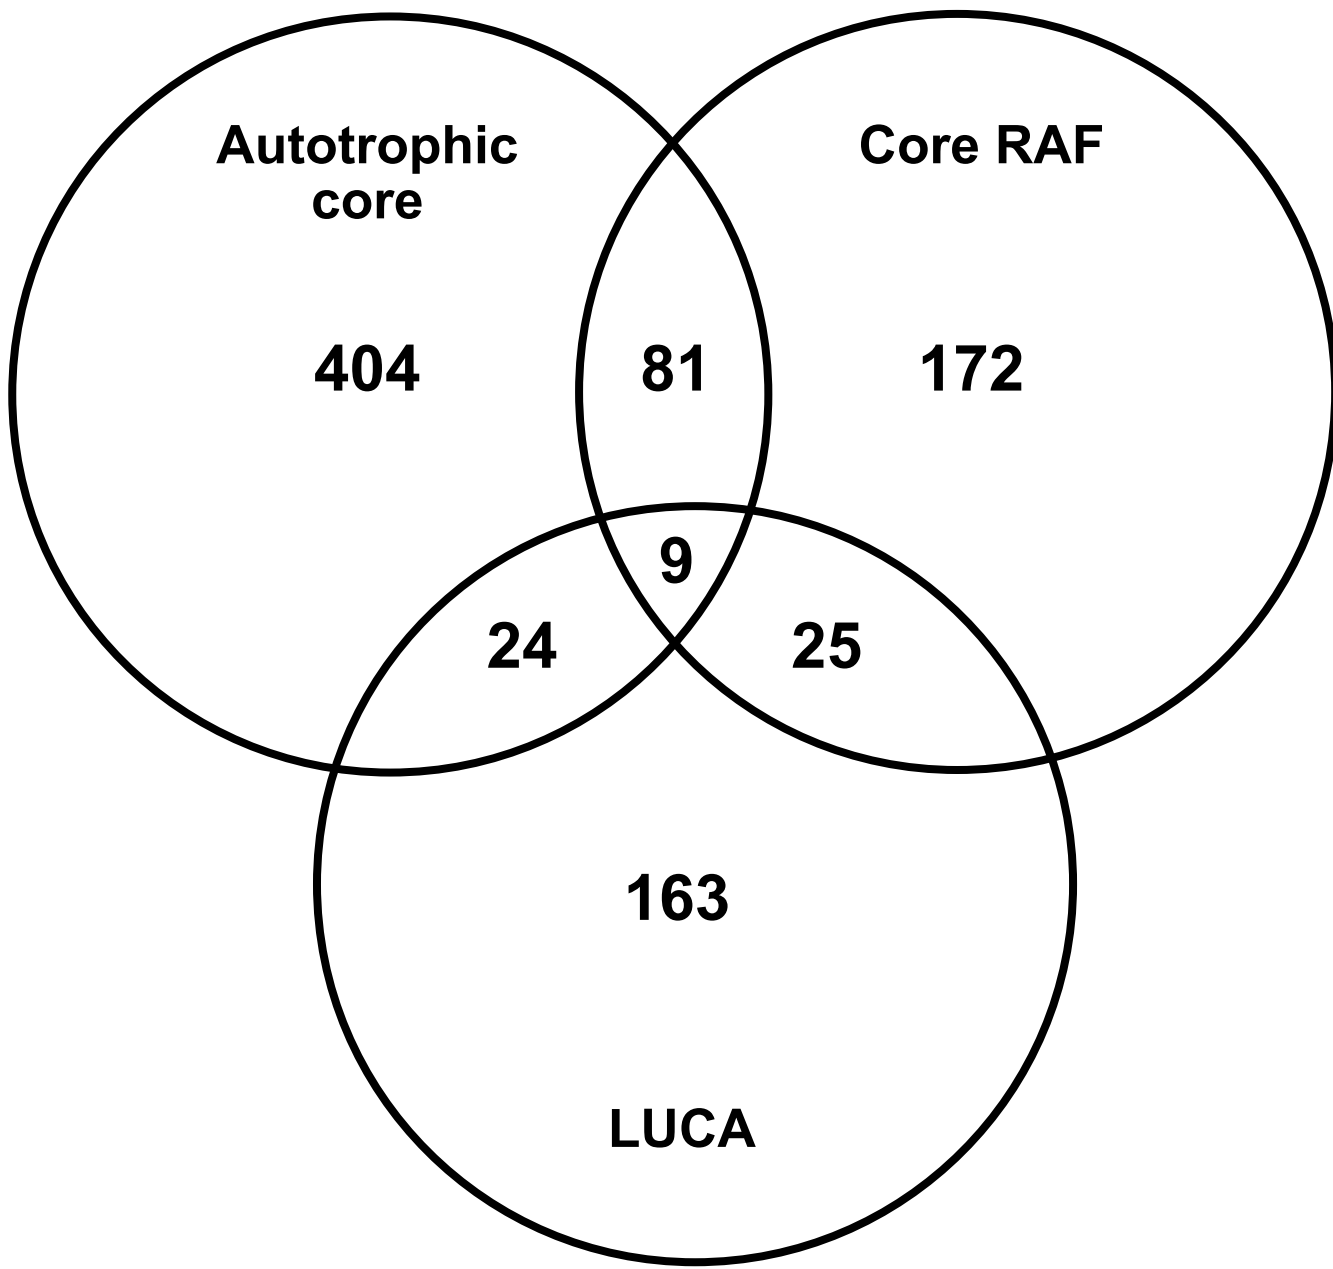

Supplement: s1 [file s1]
